# Supplementary material for: Synchronous Improvement of Mechanical and Damping Properties of Structural Damping Composites with Polyetherimide Non-Woven Fabric Interlayers Loaded with Polydopamine and Carbon Nanotubes
Source: MDPI journal article supplement (doi:10.3390/polym15143117), 2023-07-21
Supplement: s1 [file s1]

Table. S1 All data of flexural test and Interlaminar Shear test of control

| Control                  | Flexural strength/MP | Flexural modulus/GPa | Interlaminar Shear strength/MP |
|--------------------------|----------------------|----------------------|--------------------------------|
| 1                        | 1723.41              | 122.25               | 96.27                          |
| 2                        | 1725.92              | 122.75               | 100.19                         |
| 3                        | 1727.45              | 124.22               | 104.14                         |
| 4                        | 1727.43              | 124.84               | 103.00                         |
| 5                        | 1726.28              | 125.08               | 106.93                         |
| 6                        | 1719.18              | 121.17               | 110.46                         |
| Average value            | 1724. 95             | 123.38               | 103.00                         |
| Standard deviation value | 3.19                 | 1.60                 | 4.98                           |

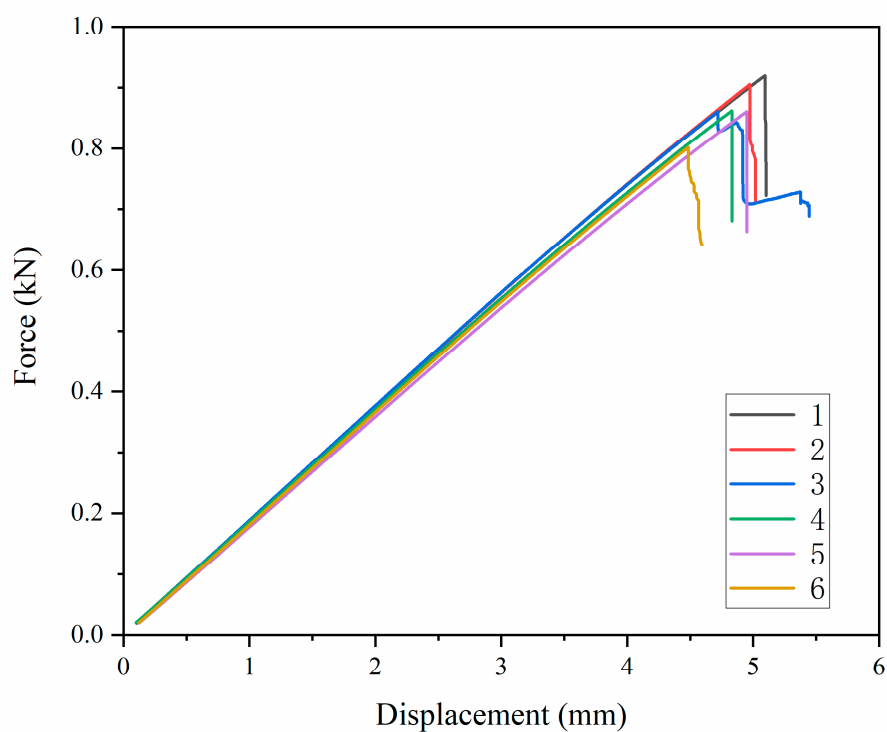

Fig.S1 Force-displacement curve of flexural test of control.

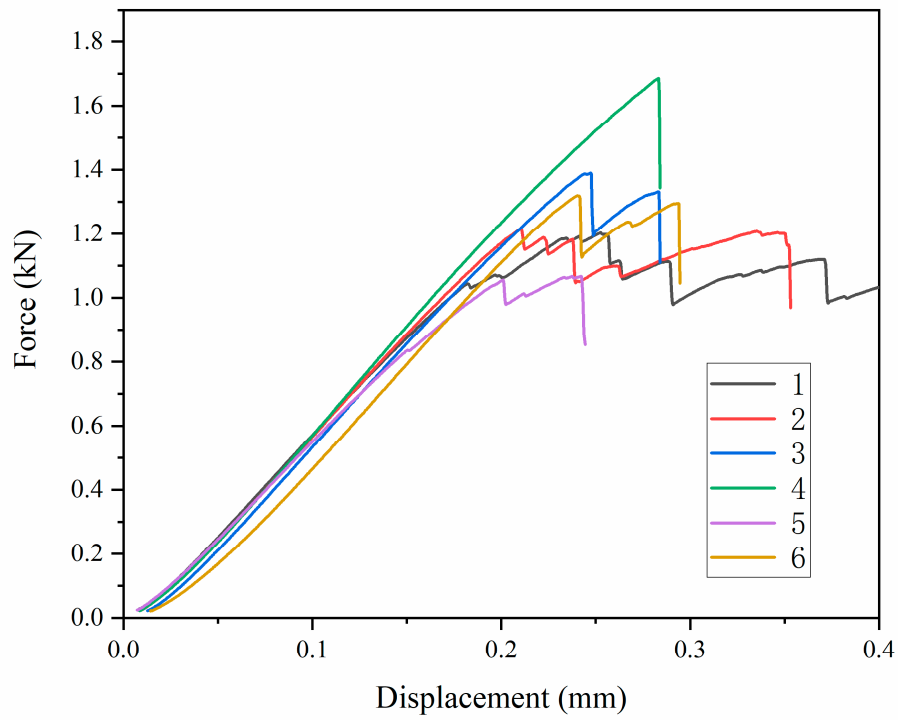

Fig.S2 Force-displacement curve of interlaminar shear strength test of control.

Table. S2 All data of flexural test and Interlaminar Shear test of PEI<sub>(C)</sub>

| PEI <sub>(C)</sub>              | Flexural strength/MP | Flexural modulus/GPa | Interlaminar Shear strength/MP |
|---------------------------------|----------------------|----------------------|--------------------------------|
| 1                               | 1607.35              | 116.63               | 101.84                         |
| 2                               | 1611.26              | 109.92               | 97.15                          |
| 3                               | 1613.92              | 111.49               | 103.68                         |
| 4                               | 1613.69              | 116.25               | 94.58                          |
| 5                               | 1611.83              | 108.92               | 98.49                          |
| 6                               | 1599.95              | 113.86               | 101.94                         |
| <b>Average value</b>            | 1609.67              | 112.84               | 99.61                          |
| <b>Standard deviation value</b> | 5.32                 | 3.25                 | 3.50                           |

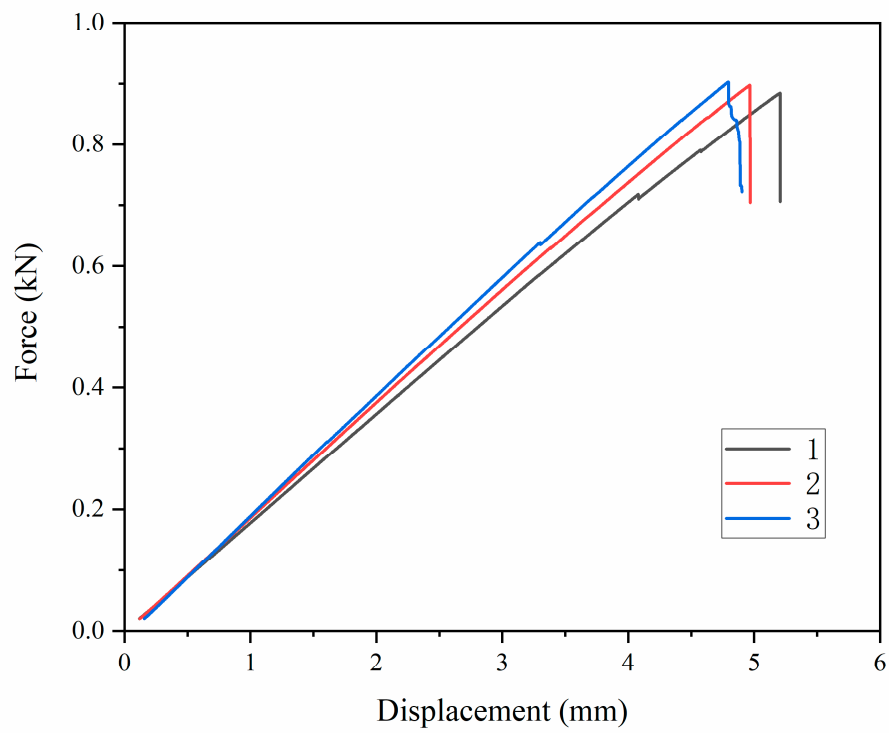

Fig.S3 Force-displacement curve of flexural test of PEI<sub>(C)</sub>.

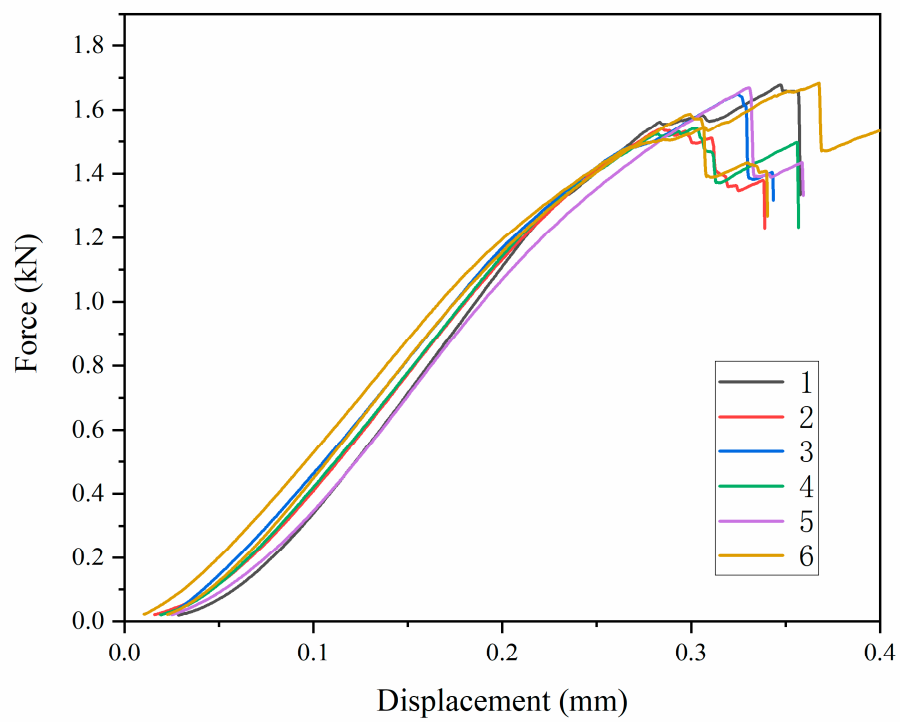

Fig.S4 Force-displacement curve of interlaminar shear strength test of PEI<sub>(C)</sub>.

Table. S3 All data of flexural test and Interlaminar Shear test of PEI<sub>(D)</sub>.

| PEI <sub>(D)</sub>              | Flexural strength/MP | Flexural modulus/GPa | Interlaminar Shear strength/MP |
|---------------------------------|----------------------|----------------------|--------------------------------|
| 1                               | 1534.21              | 111.29               | 97.71                          |
| 2                               | 1536.21              | 109.70               | 94.34                          |
| 3                               | 1536.21              | 111.93               | 98.59                          |
| 4                               | 1532.38              | 110.45               | 92.37                          |
| 5                               | 1535.59              | 112.53               | 95.54                          |
| 6                               | 1542.68              | 111.39               | 90.05                          |
| <b>Average value</b>            | 1536.21              | 111.21               | 94.77                          |
| <b>Standard deviation value</b> | 3.49                 | 1.02                 | 3.23                           |

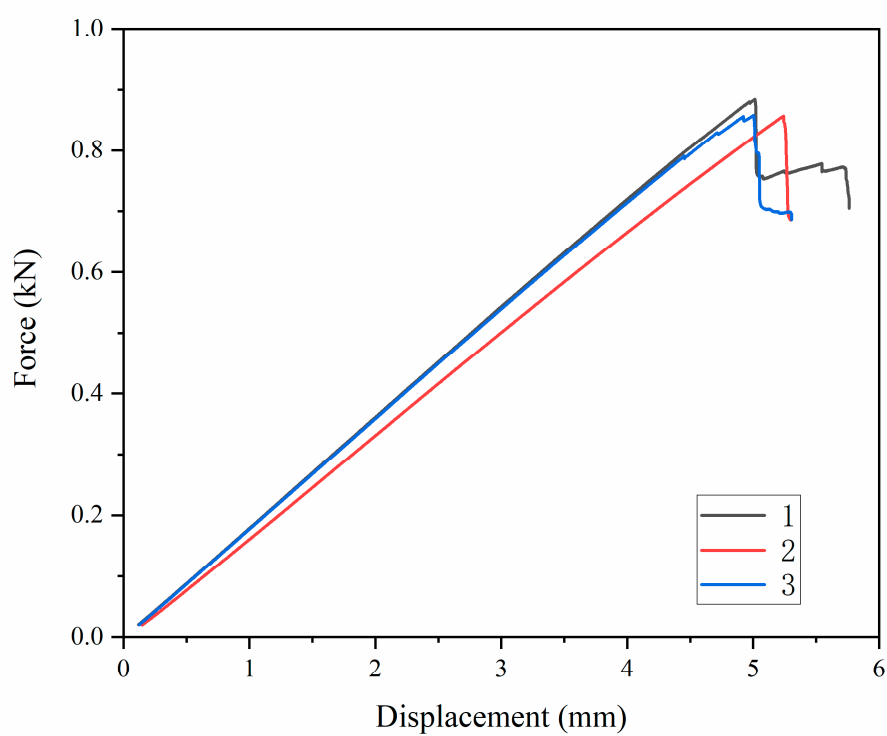

Fig.S5 Force-displacement curve of flexural test of PEI<sub>(D)</sub>.

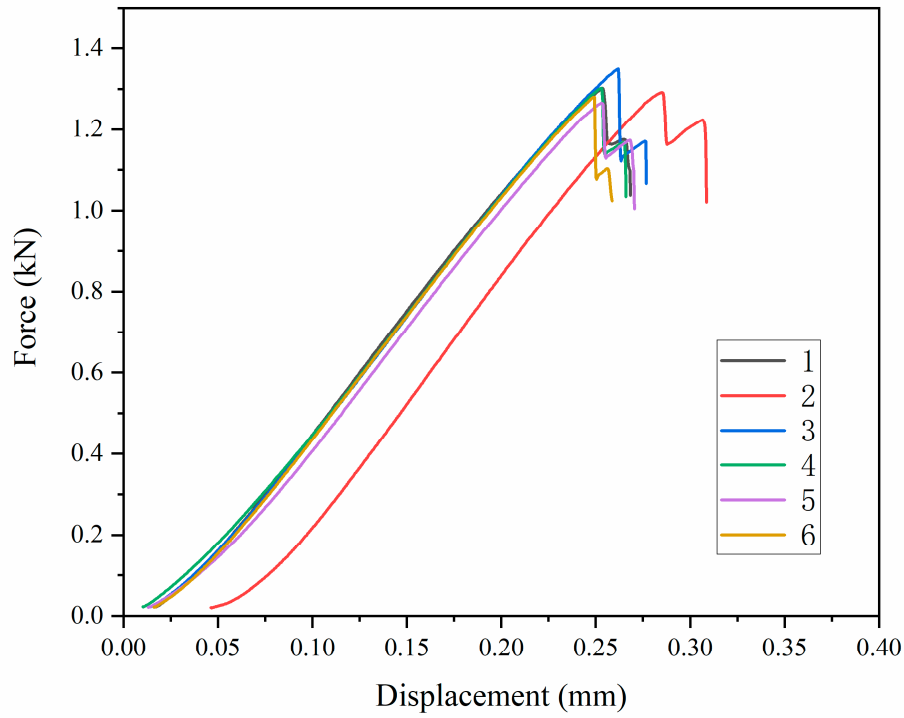

Fig.S6 Force-displacement curve of interlaminar shear strength test of PEI<sub>(D)</sub>.

Table. S4 All data of flexural test and Interlaminar Shear test of MWCNTs/PEI<sub>(C)</sub>.

| MWCNTs/PEI <sub>(C)</sub>       | Flexural strength/MP | Flexural modulus/GPa | Interlaminar Shear strength/MP |
|---------------------------------|----------------------|----------------------|--------------------------------|
| 1                               | 1676.75              | 127.80               | 108.61                         |
| 2                               | 1679.50              | 127.17               | 96.37                          |
| 3                               | 1680.87              | 127.42               | 99.71                          |
| 4                               | 1677.33              | 125.29               | 103.53                         |
| 5                               | 1672.05              | 127.15               | 97.66                          |
| 6                               | 1680.61              | 127.01               | 102.85                         |
| <b>Average value</b>            | 1677.90              | 126.97               | 101.46                         |
| <b>Standard deviation value</b> | 3.30                 | 0.87                 | 4.49                           |

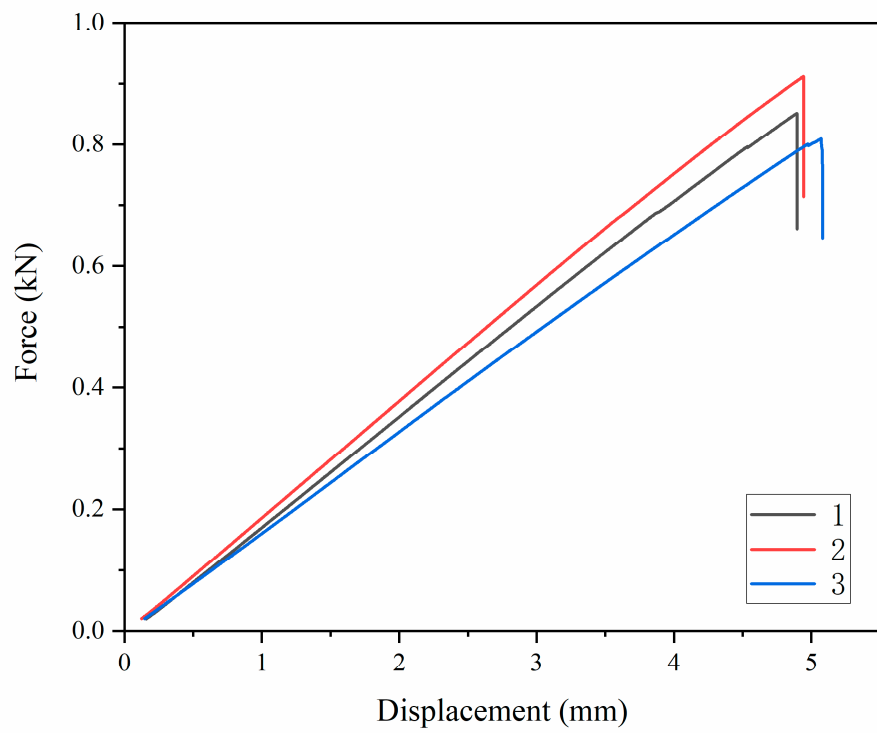

Fig.S7 Force-displacement curve of flexural test of MWCNTs/PEI<sub>(C)</sub>.

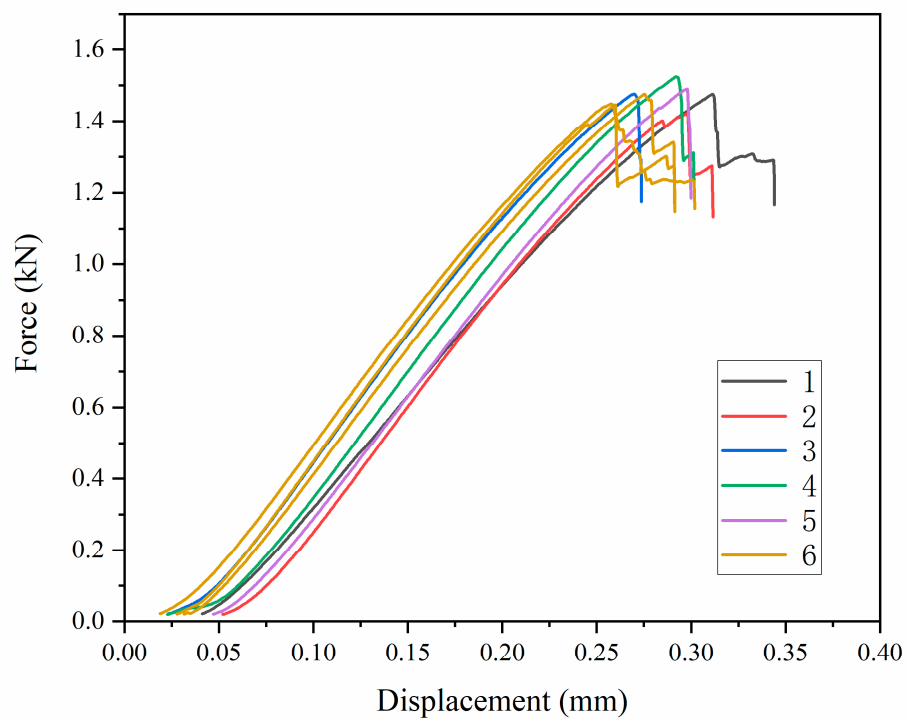

Fig.S8 Force-displacement curve of interlaminar shear strength test of MWCNTs/PEI<sub>(C)</sub>.

Table. S5 All data of flexural test and Interlaminar Shear test of MWCNTs/PEI<sub>(D)</sub>.

| MWCNTs/PEI(D)                   | Flexural strength/MP | Flexural modulus/GPa | Interlaminar Shear strength/MP |
|---------------------------------|----------------------|----------------------|--------------------------------|
| 1                               | 1611.56              | 119.45               | 100.19                         |
| 2                               | 1621.64              | 120.13               | 101.95                         |
| 3                               | 1622.02              | 120.04               | 101.30                         |
| 4                               | 1614.35              | 119.44               | 99.91                          |
| 5                               | 1616.05              | 119.30               | 96.48                          |
| 6                               | 1617.78              | 119.56               | 105.17                         |
| <b>Average value</b>            | 1617.23              | 119.65               | 100.83                         |
| <b>Standard deviation value</b> | 4.11                 | 0.30                 | 2.85                           |

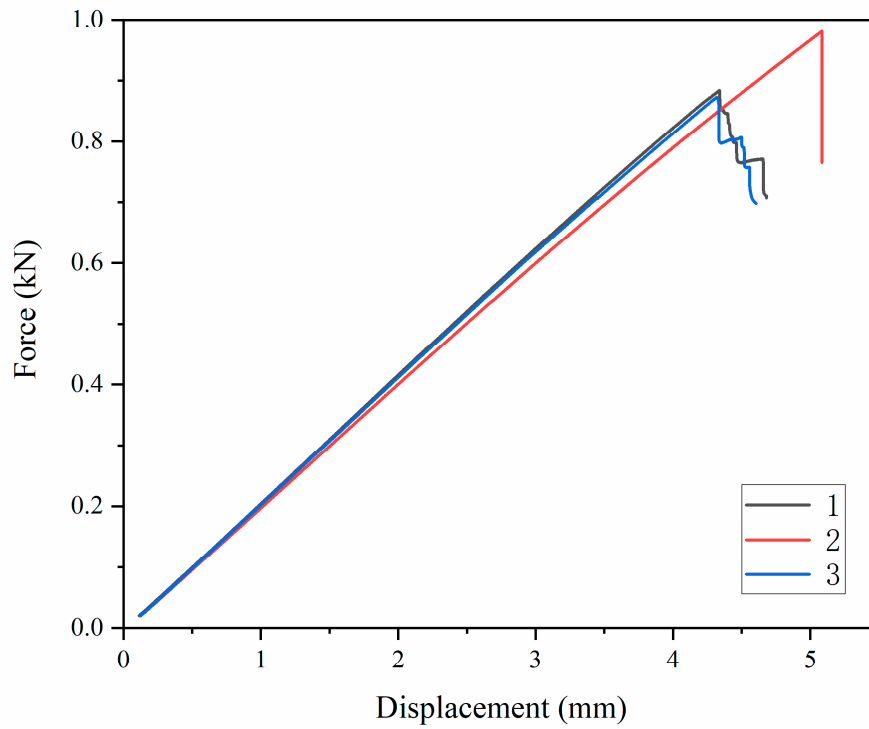

Fig.S9 Force-displacement curve of flexural test of MWCNTs/PEI<sub>(D)</sub>.

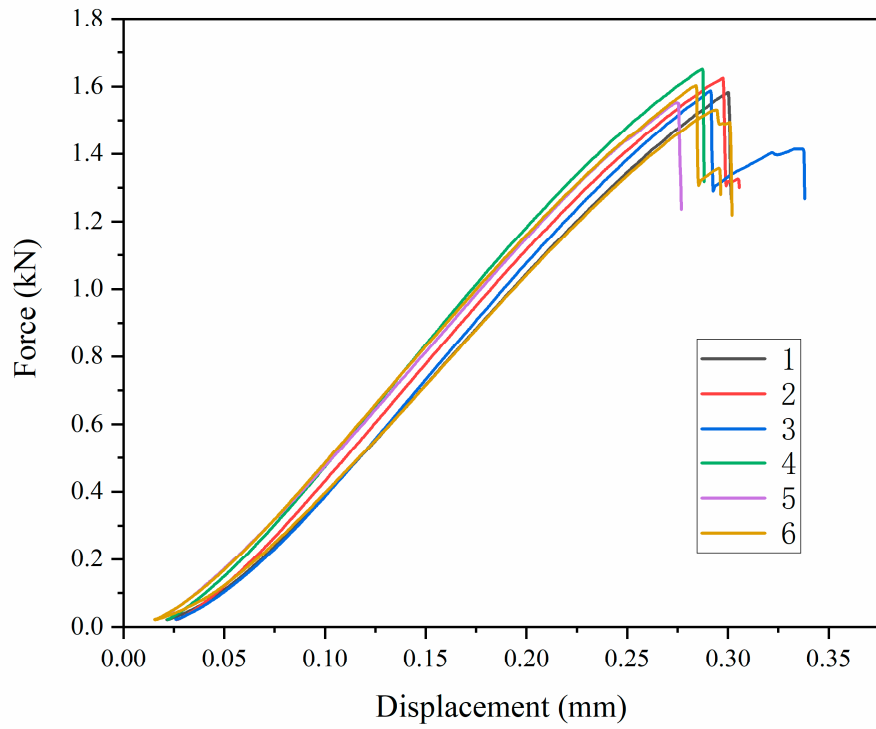

Fig.S10 Force-displacement curve of interlaminar shear strength test of MWCNTs/PEI<sub>(D)</sub>.

Table. S6 All data of flexural test and Interlaminar Shear test of MWCNTs@PDA/PEI<sub>(C)</sub>.

| MWCNTs@PDA /PEI <sub>(C)</sub>  | Flexural strength/MP | Flexural modulus/GPa | Interlaminar Shear strength/MP |
|---------------------------------|----------------------|----------------------|--------------------------------|
| 1                               | 1893.97              | 141.84               | 114.01                         |
| 2                               | 1899.60              | 141.84               | 107.83                         |
| 3                               | 1884.65              | 141.88               | 110.29                         |
| 4                               | 1885.04              | 145.81               | 110.22                         |
| 5                               | 1884.49              | 133.67               | 111.83                         |
| 6                               | 1885.35              | 145.97               | 107.58                         |
| <b>Average value</b>            | 1888.8               | 141.84               | 110.29                         |
| <b>Standard deviation value</b> | 6.41                 | 4.46                 | 2.43                           |



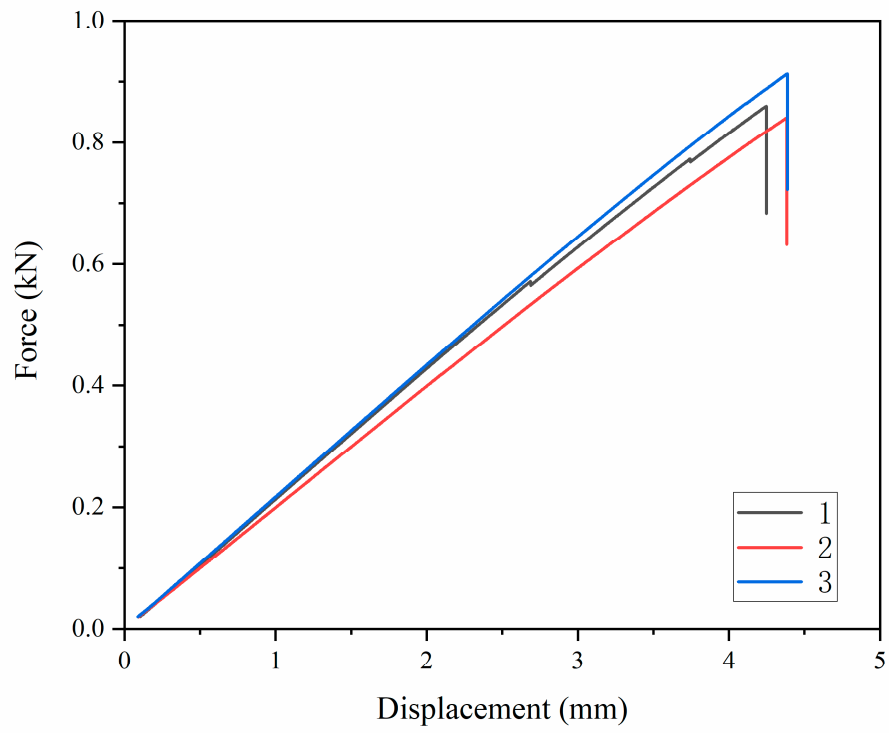

Fig.S11 Force-displacement curve of flexural test of MWCNTs@PDA/PEI<sub>(C)</sub>.

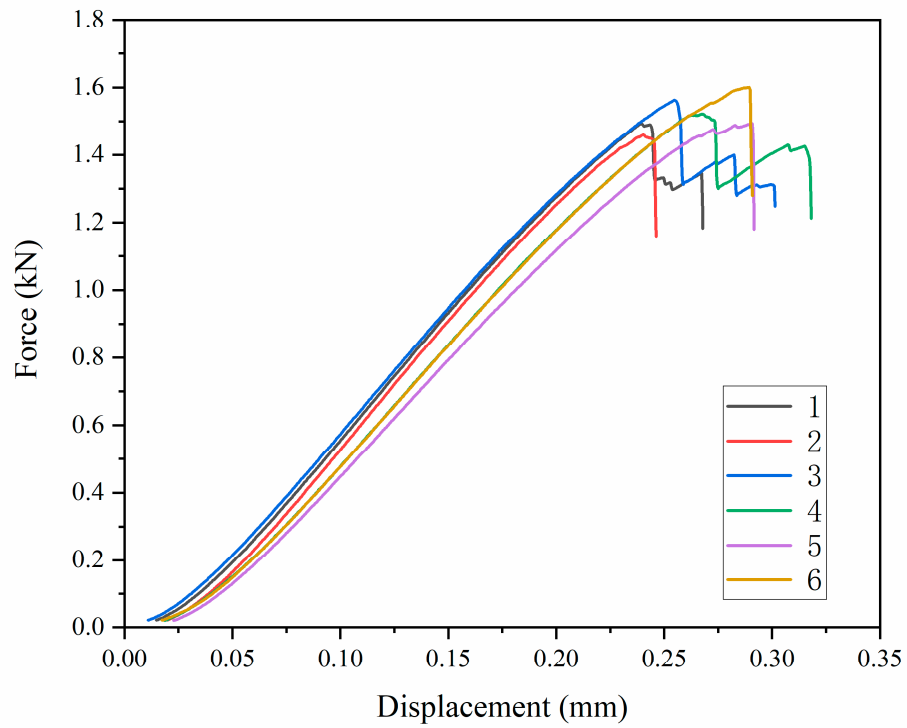

Fig.S12 Force-displacement curve of interlaminar shear strength test of MWCNTs@PDA/PEI<sub>(C)</sub>.

MWCNTs@PDA/PEI<sub>(C)</sub>.

Table. S7 All data of flexural test and Interlaminar Shear test of MWCNTs@PDA/PEI<sub>(D)</sub>.

| MWCNTs@PDA/PEI <sub>(D)</sub>   | Flexural strength/MP | Flexural modulus/GPa | Interlaminar Shear strength/MP |
|---------------------------------|----------------------|----------------------|--------------------------------|
| 1                               | 1868.91              | 133.34               | 104.38                         |
| 2                               | 1869.28              | 133.33               | 101.53                         |
| 3                               | 1864.58              | 136.63               | 107.17                         |
| 4                               | 1862.02              | 130.21               | 108.45                         |
| 5                               | 1869.29              | 133.30               | 115.04                         |
| 6                               | 1869.32              | 131.53               | 106.43                         |
| <b>Average value</b>            | 1867.23              | 133.06               | 107.17                         |
| <b>Standard deviation value</b> | 3.16                 | 2.16                 | 4.55                           |

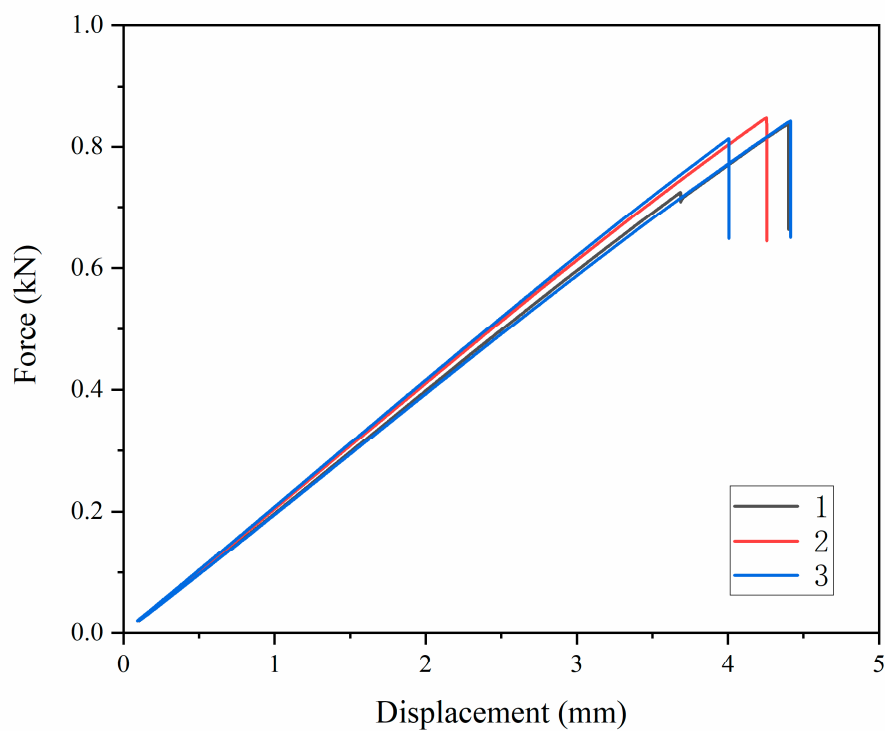

Fig.S13 Force-displacement curve of flexural test of MWCNTs@PDA/PEI<sub>(D)</sub>.

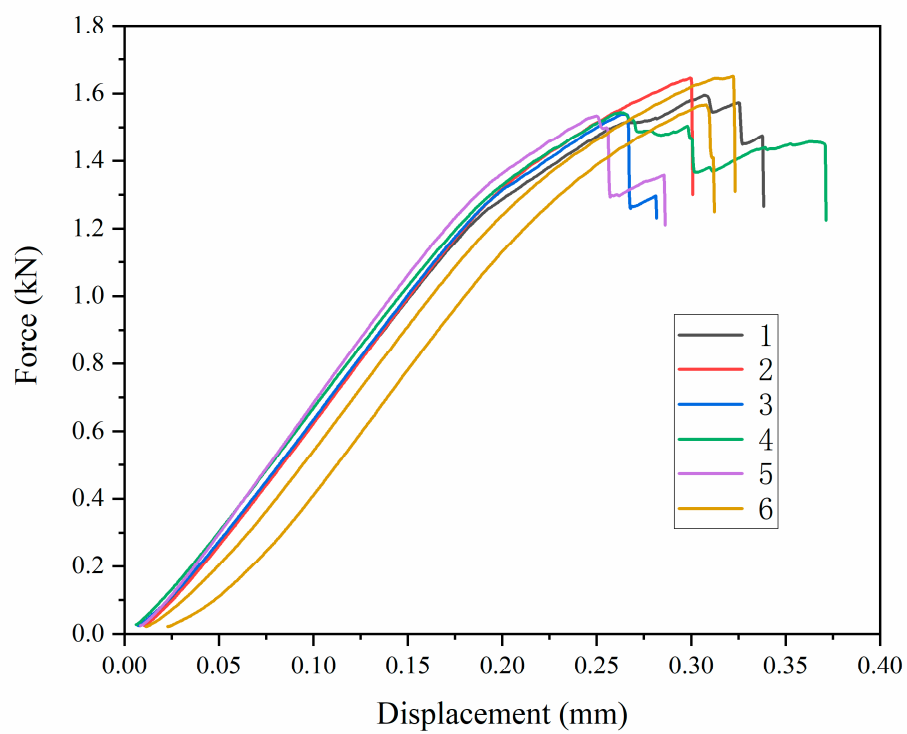

Fig.S14 Force-displacement curve of interlaminar shear strength test of MWCNTs@PDA/PEI(D).
